# Supplementary material for: One-pot synthesis of monodisperse Cu2O nanoparticle aggregates through an in situ seed generation process
Source: Royal Society of Chemistry journal article supplement (doi:10.1039/c9ce01279f), 2019-11-12
Supplement: c9ce01279f1.pdf [file c9ce01279f1.pdf]

# One-pot synthesis of monodisperse Cu<sub>2</sub>O nanoparticle aggregates through an *in situ* generated seed process

Jianwei Jiang, Sanghyuk Park\* and Longhai Piao\*

## Supporting Information

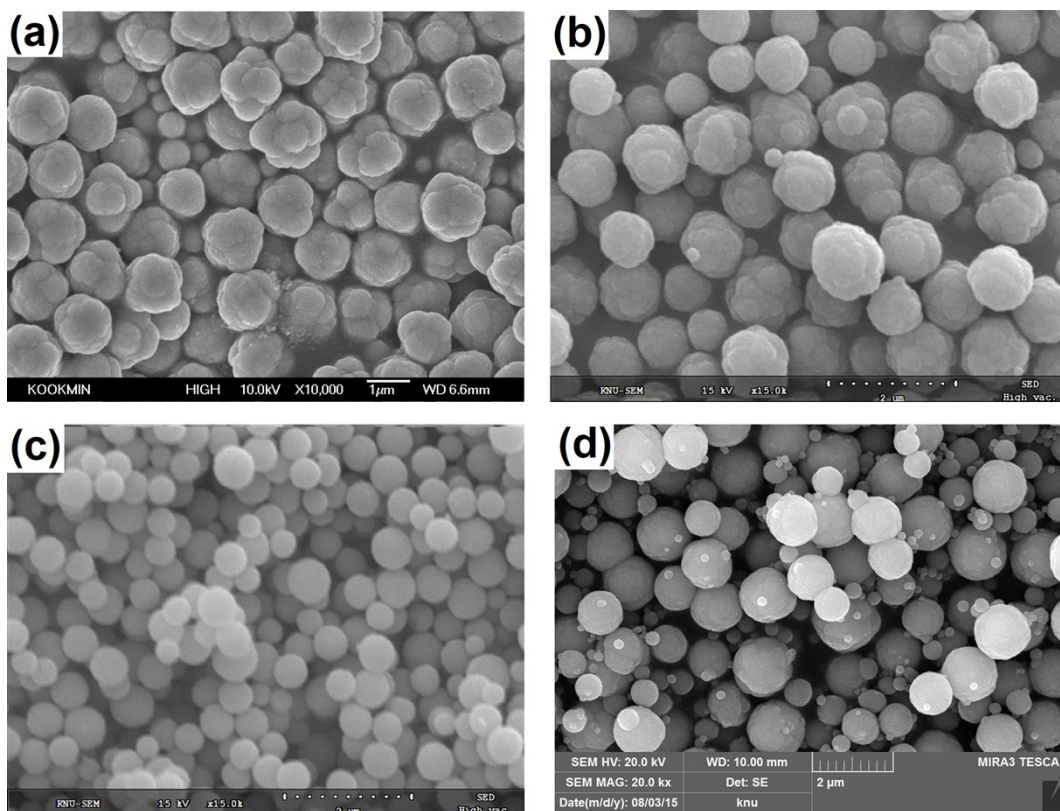

**Fig. S1** Synthesis of Cu<sub>2</sub>O NPAs using the different types of surfactants: (a) hydroxypropyl cellulose, (b) PEG-4,000, (c) PAM-1500, and (d) PVP-55,000.

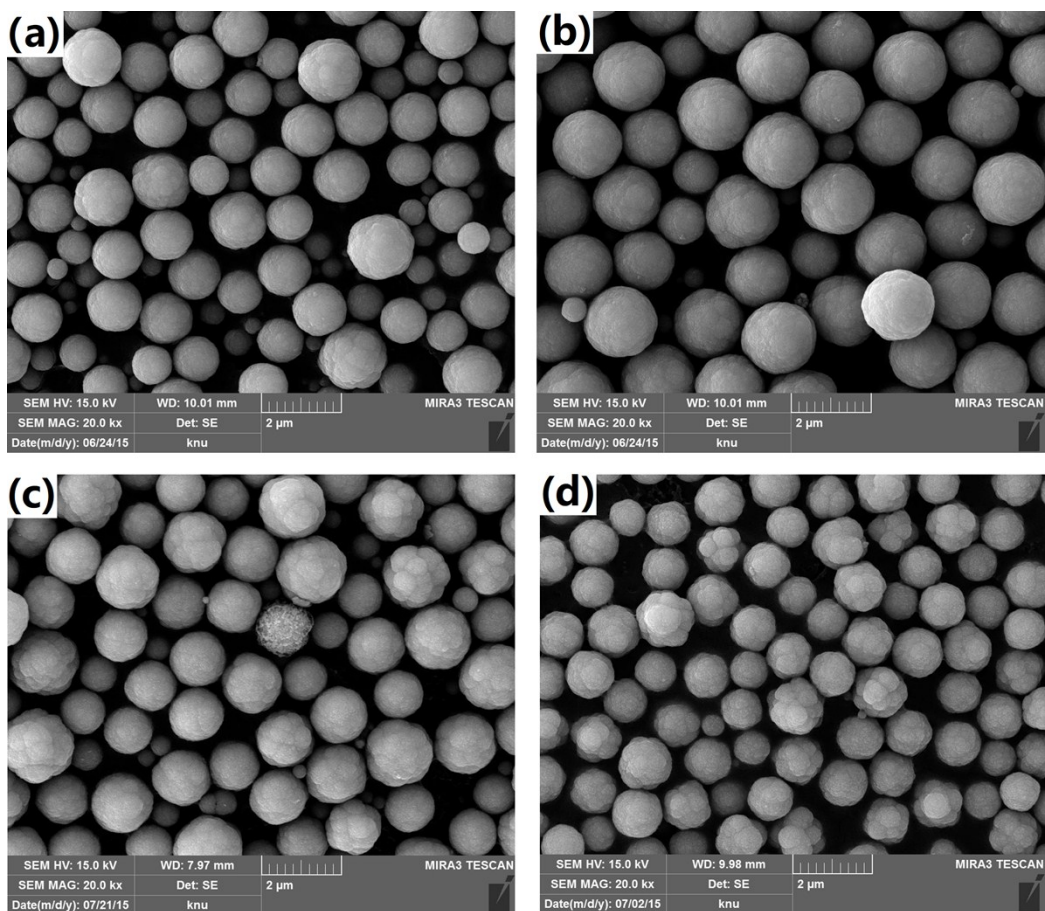

**Fig. S2** Synthesis of  $\text{Cu}_2\text{O}$  NPAs using PVP with different chain lengths: (a) 10,000 g/mol, (b) 29,000 g/mol, (c) 40,000 g/mol, and (d) 55,000 g/mol.

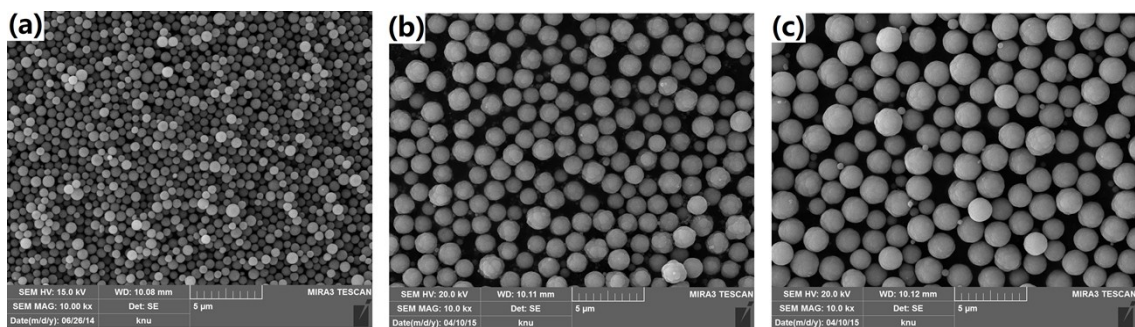

**Fig. S3** Synthesis of  $\text{Cu}_2\text{O}$  NPAs by varying the PVP-29,000 concentration: (a) 60 g/L, (b) 40 g/L, and (c) 20 g/L.

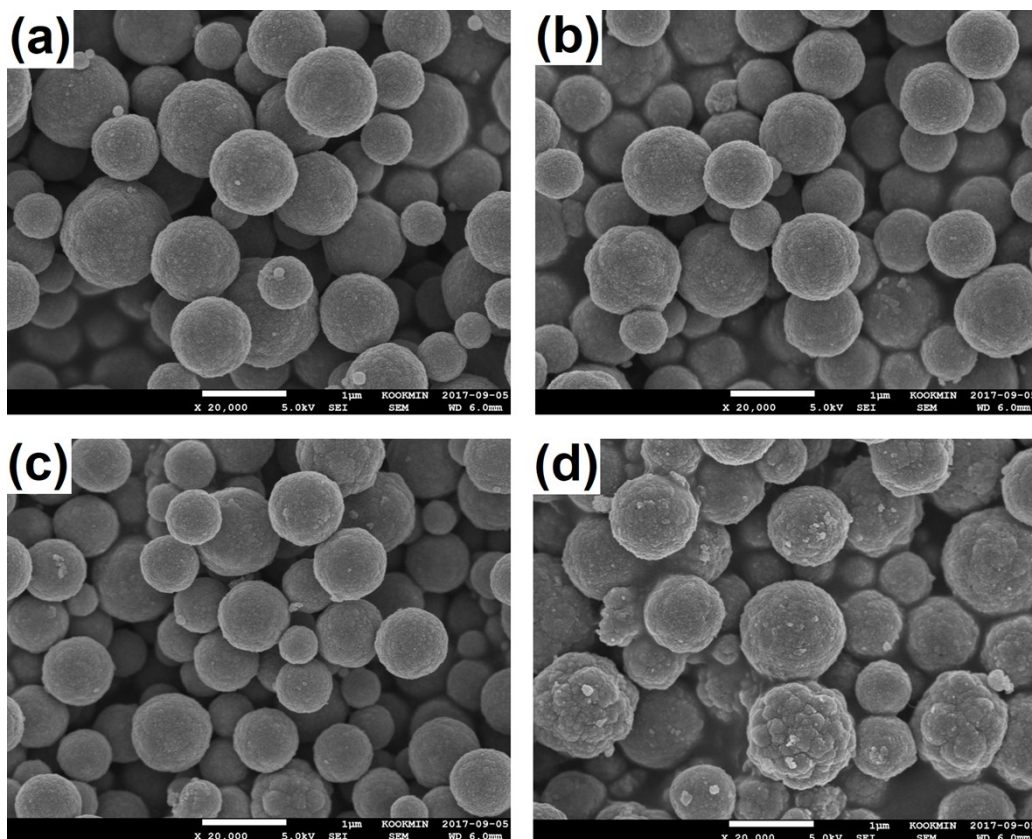

**Fig. S4** Synthesis of Cu<sub>2</sub>O NPs under different reaction temperatures in the presence of the PVP-10,000: (a) 27 °C, (b) 40 °C, (c) 55 °C, and (d) 70 °C.

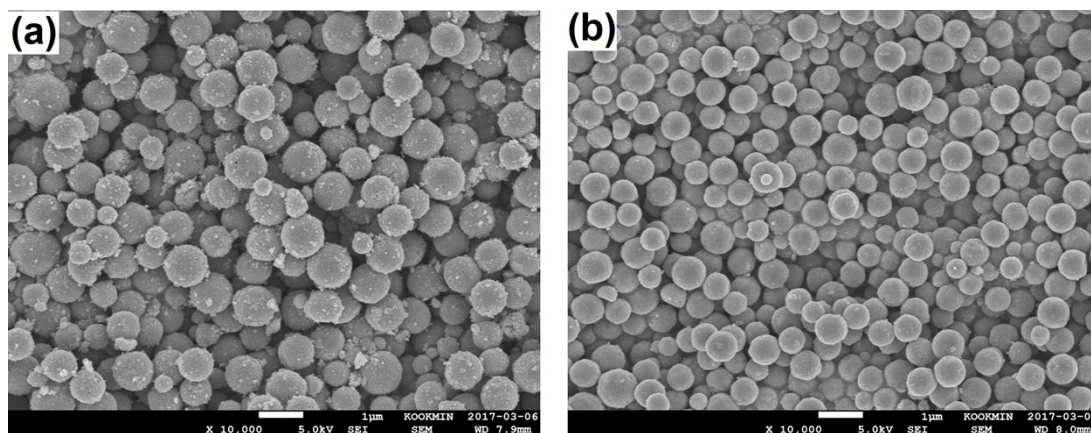

**Fig. S5** Synthesis of Cu<sub>2</sub>O NPs using a mixed solvent (the volume ratio of ethanol to H<sub>2</sub>O is 7/3): (a) 40 g/L of PVP-10,000 and (b) 60 g/L of PVP-10,000.



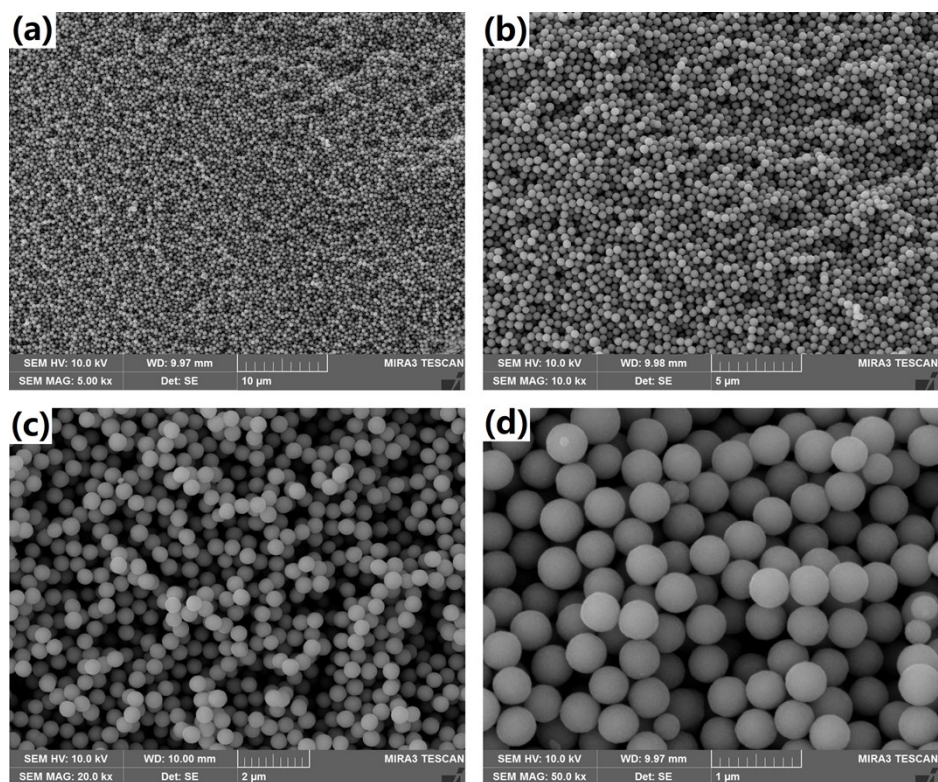

**Fig. S6** SEM images of  $\text{Cu}_2\text{O}$  NPs with 3% NaCl at different resolutions.

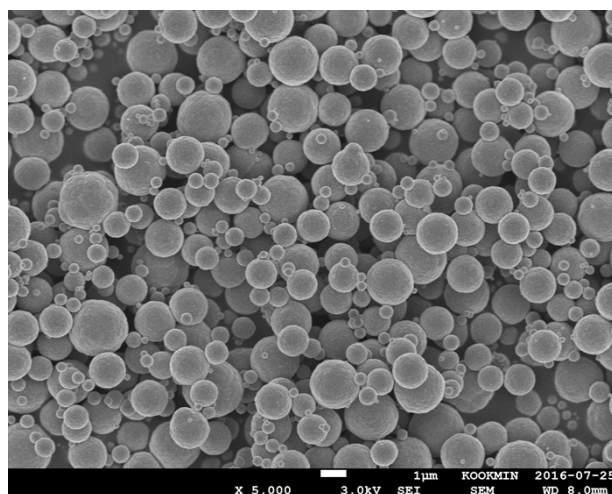

**Fig. S7** Synthesis of  $\text{Cu}_2\text{O}$  NPs with the addition of  $\text{NaNO}_3$ .

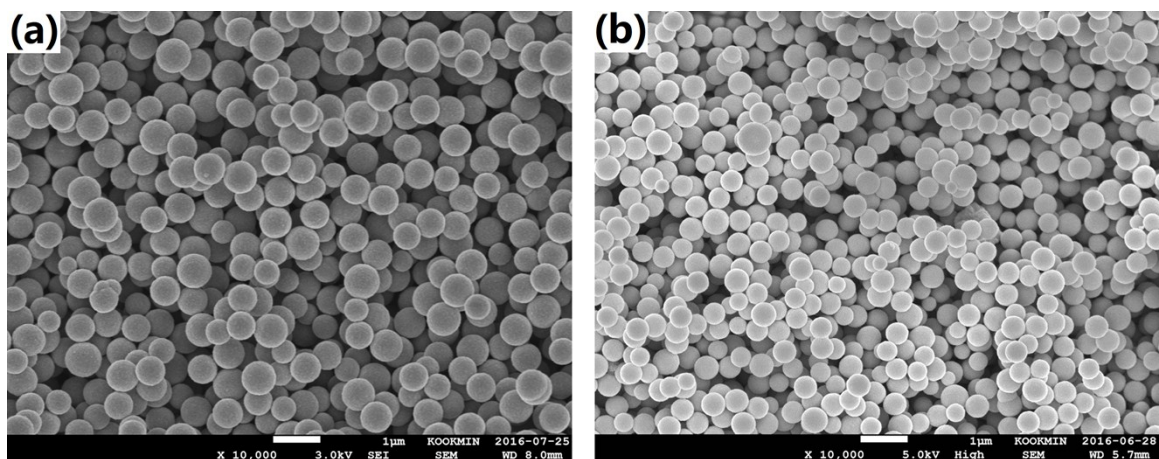

**Fig. S8** Synthesis of  $\text{Cu}_2\text{O}$  NPAs with the addition of (a) KCl (3%) and (b) NaCl (3%).

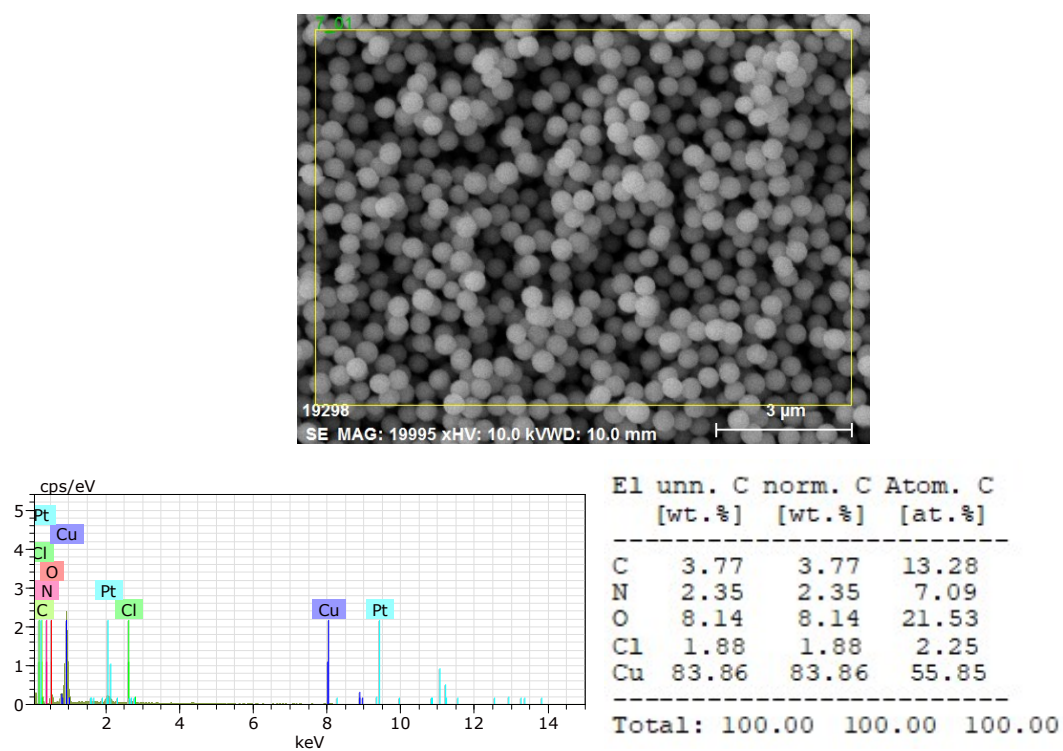

**Fig. S9** EDX spectrum of the  $\text{Cu}_2\text{O}$  NPAs synthesized with NaCl (3%).



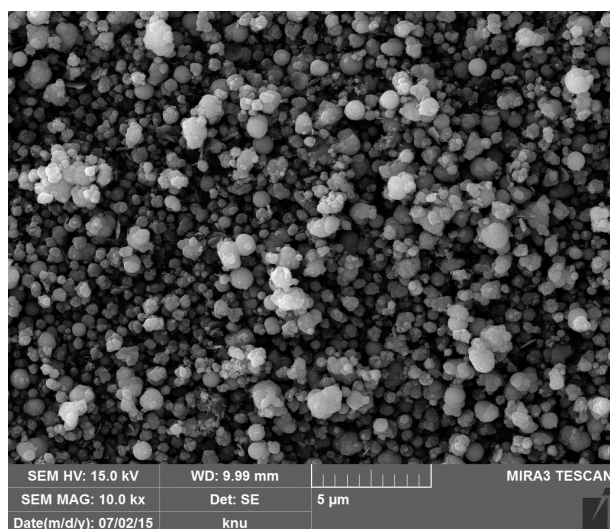

**Fig. S10** Synthesis of  $\text{Cu}_2\text{O}$  NPAs with NaCl (10%)

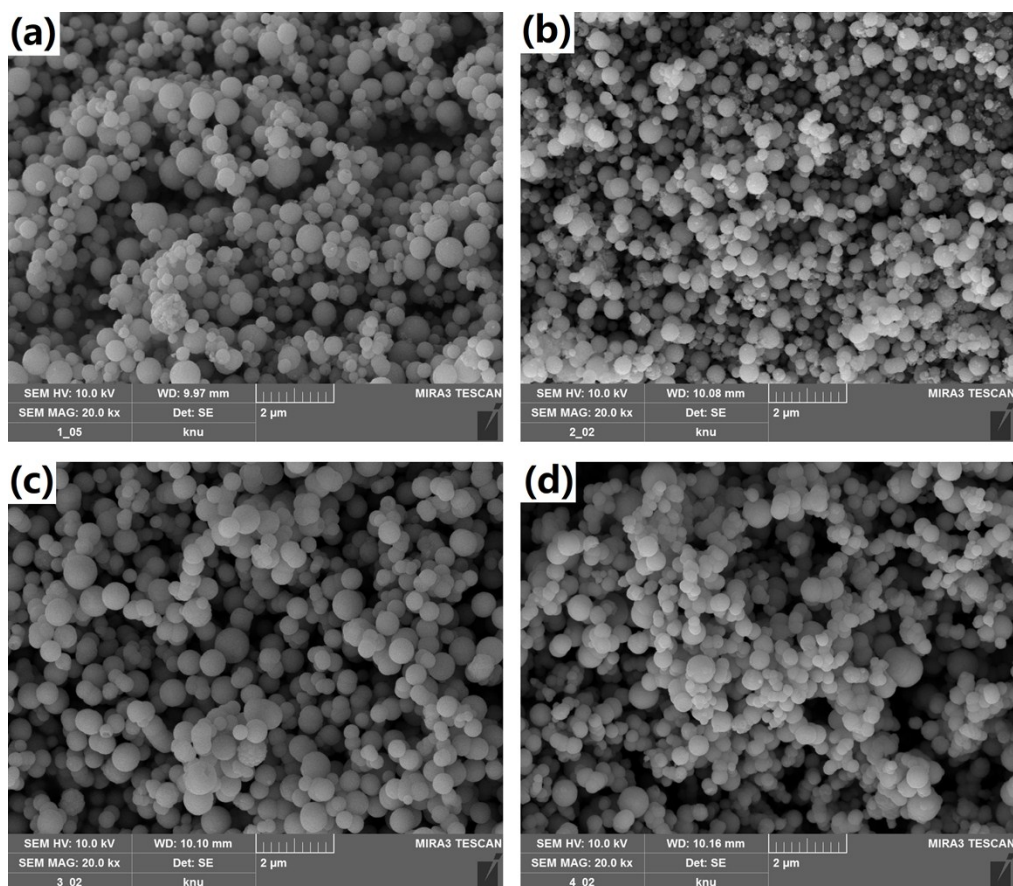

**Fig. S11** Synthesis of  $\text{Cu}_2\text{O}$  NPAs without stirring with NaCl (a) 2%, (b) 3%, (c) 4%, and (d) 6%.

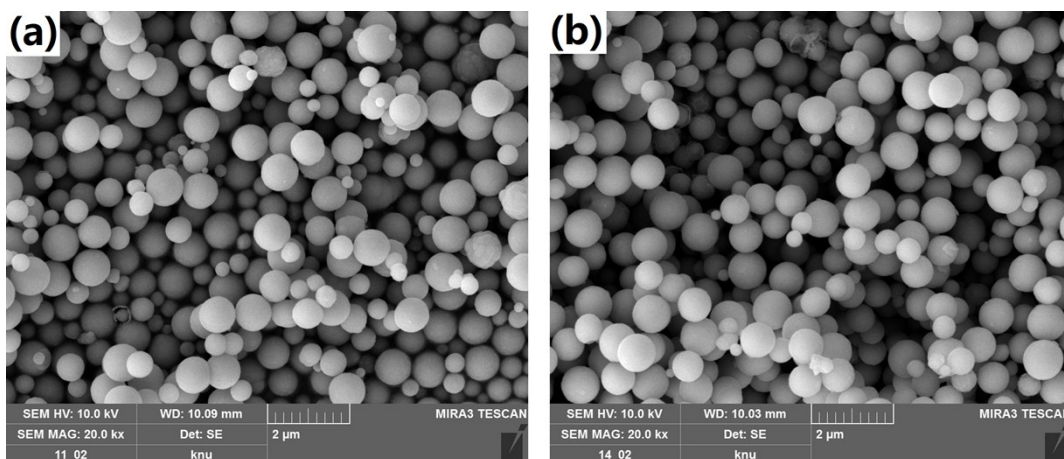

**Fig. S12** Synthesis of  $\text{Cu}_2\text{O}$  NPAs at a stirring rate of 600 rpm with NaCl (a) 3% and (b) 4%.

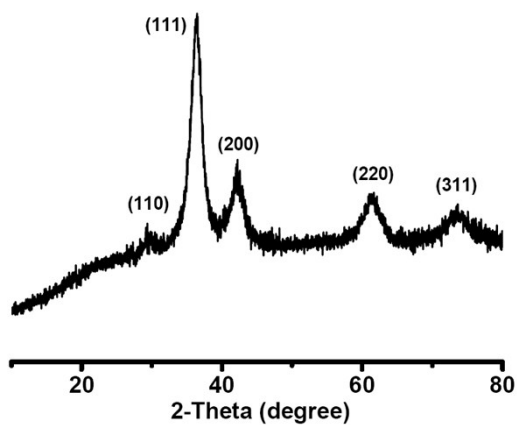

**Fig. S13** XRD pattern of  $\text{Cu}_2\text{O}$  NPAs (4% NaCl) after storing for one month in air at 4 degree.

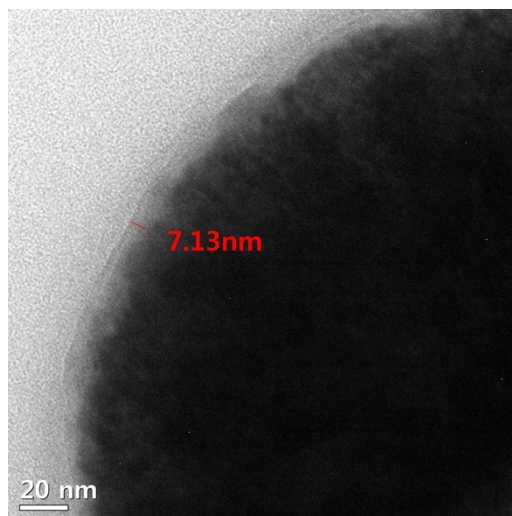

**Fig. S14** TEM image of  $\text{Cu}_2\text{O}$  NPAs (4% NaCl).

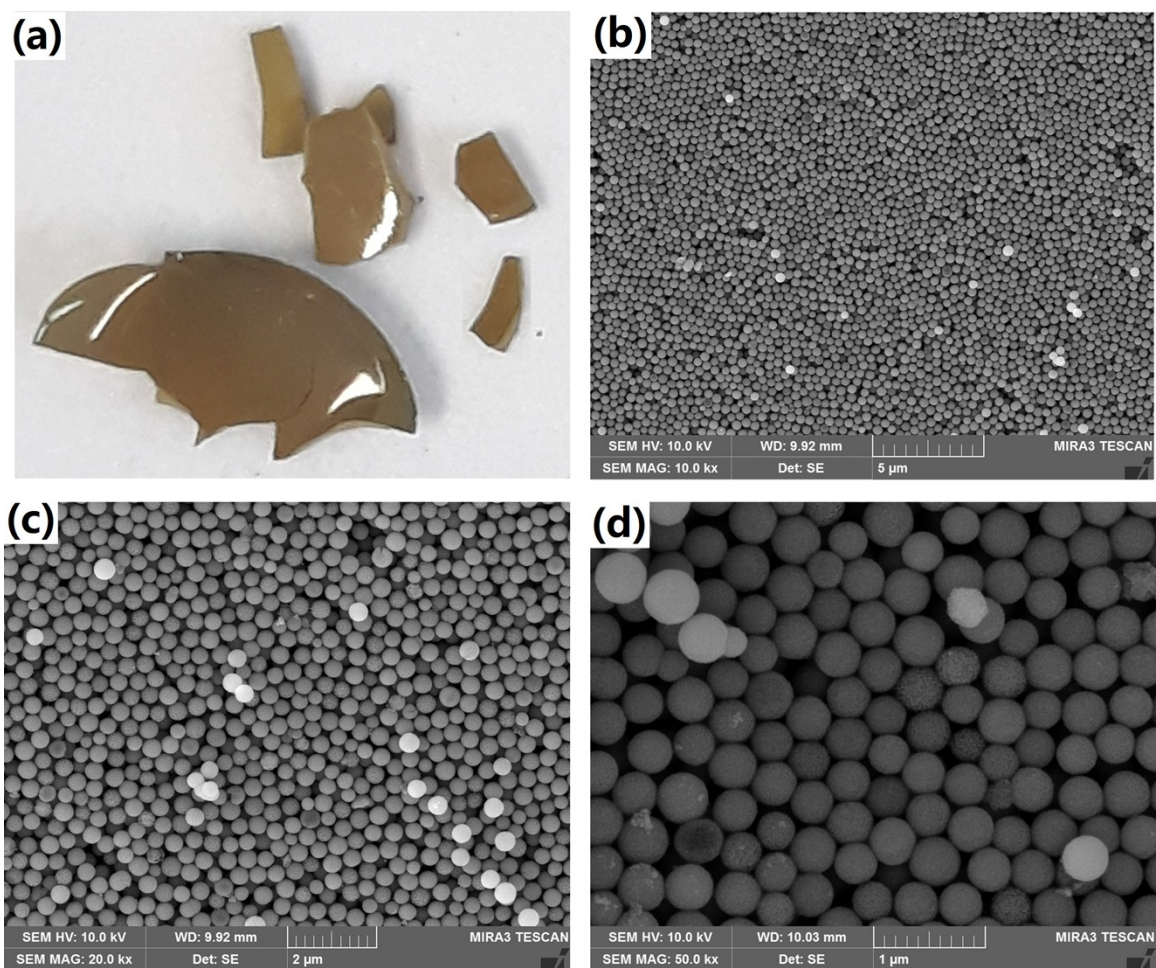

**Fig. S15** The photograph (a) and SEM images (b-d) of  $\text{Cu}_2\text{O}$  from a gram-scale synthesis.
